# Supplementary material
Source: Springer Nature journal article supplement (https://www.springermedizin.de/resource/supplementary/12885_2009_2413_MOESM7_ESM.pdf/9461232)

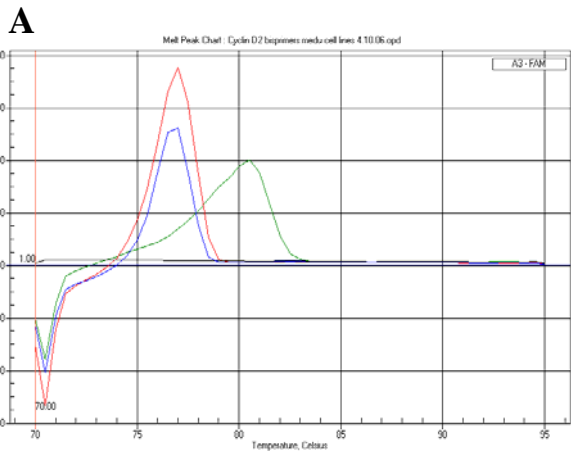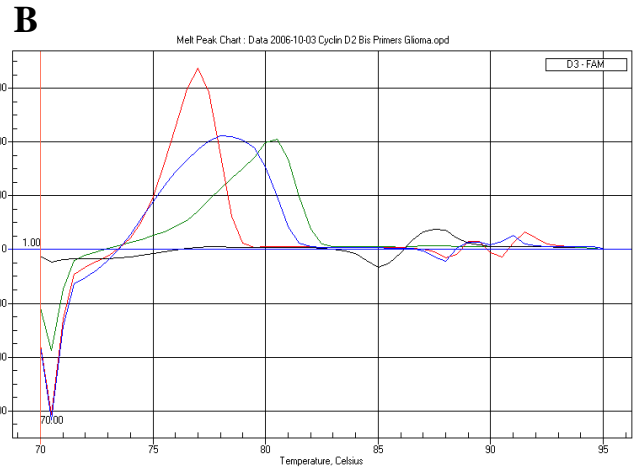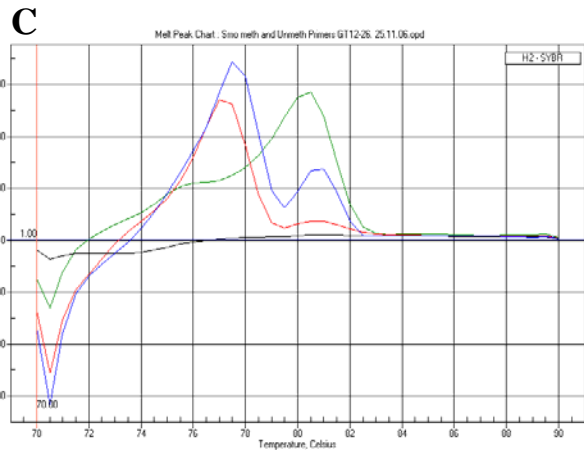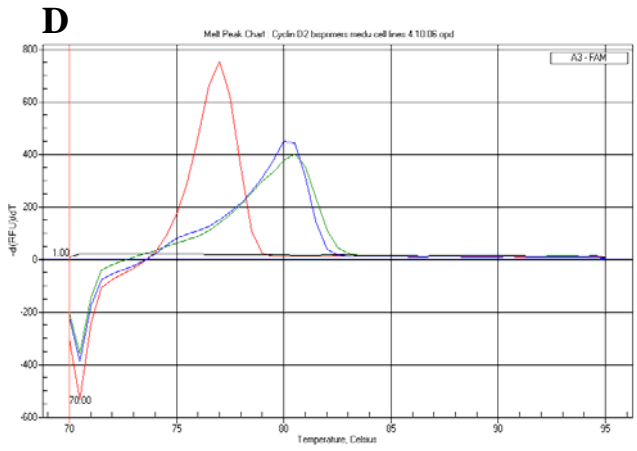

**TE671** **PFSK-1** **Daoy** **TE671c2** **D283** **SK-PN-DW**  
 U M U M U M U M U M U M

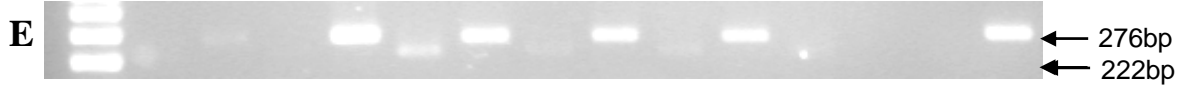

**U87** **A172** **LN405** **SW1783** **T98G** **SW108** **CCF-ST** **GOS3**  
 Mr U M U M U M U M U M U M U M U M NTC

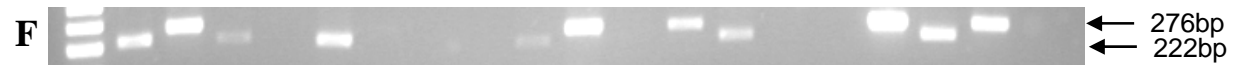

**3** **4** **7** **10** **11** **13** **14** **17** **20**  
 Mr U M U M U M U M U M U M U M U M

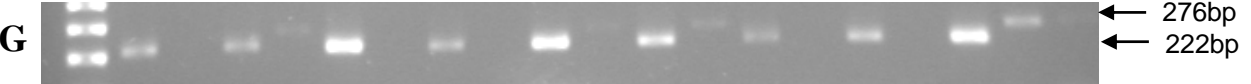

**21** **22** **23** **24** **25** **26** **29** **30** **31**  
 Mr U M U M U M U M U M U M U M U M NTC

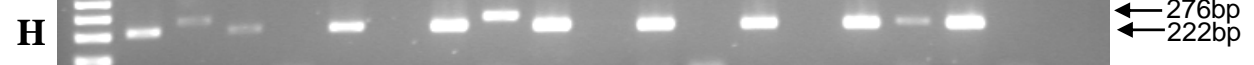

Supplement: MOESM7 [file 9461232]
